# Supplementary material for: Ultrafast carrier transport in ultrafine porous 2D polymers for the highly selective photocatalytic reduction of CO2to CH4
Source: Royal Society of Chemistry journal article supplement (doi:10.1039/d2ta03549a), 2022-01-01
Supplement: d2ta03549a1.pdf [file d2ta03549a1.pdf]

## **Ultrafast carrier transport in ultrafine porous polymers for highly selective photocatalytic reduction of CO<sub>2</sub> to CH<sub>4</sub>**

Guoen Tang<sup>a</sup>, Huicong Zhang<sup>a</sup>, Ting Song<sup>a,\*</sup>, Shiheng Yin<sup>b</sup>, Guojiang Mao<sup>c</sup>, Bei Long<sup>a</sup>, Atif Ali<sup>d</sup>, Guo-Jun Deng<sup>a,\*</sup>

<sup>a</sup> Key Laboratory for Green Organic Synthesis and Application of Hunan Province, Key Laboratory of Environmentally Friendly Chemistry and Application of Ministry of Education, College of Chemistry, Xiangtan University, Xiangtan 411105, P. R. China.

<sup>b</sup> Analytical and Testing Center, South China University of Technology, Guangzhou 510640, P. R. China.

<sup>c</sup> School of Chemistry and Chemical Engineering, Henan Normal University, Xinxiang, 453007, P. R. China

<sup>d</sup> Department of Chemistry and State Key Laboratory of Synthetic Chemistry, The University of Hong Kong, Pokfulam Road, Hong Kong, P. R. China.

\*Corresponding author. E-mail: [songtg@xtu.edu.cn](mailto:songtg@xtu.edu.cn), [gjdeng@xtu.edu.cn](mailto:gjdeng@xtu.edu.cn)

## Computational methods

The first-principles calculations based on the Density Functional Theory (DFT) were performed using the Materials Studio software with DMol3 model. The Perdew-Burke-Ernzerhof (PBE) exchange-correlation functional within the generalized gradient approximation (GGA) was employed to describe the exchange-correlation energy. The energy cutoff for the plane wave basis expansion was set to 600 eV. The force on each atom was set as 0.03 eV/Å for convergence criterion. Slab model was constructed in a 4×4 supercell, with a vacuum layer of 20 Å in the z direction to avoid the interaction between layers. The sampling in the Brillouin zone was set with 3×3×1 by the Monkhorst-Pack method. The van der Waals interaction was considered by using DFT-D3 method.

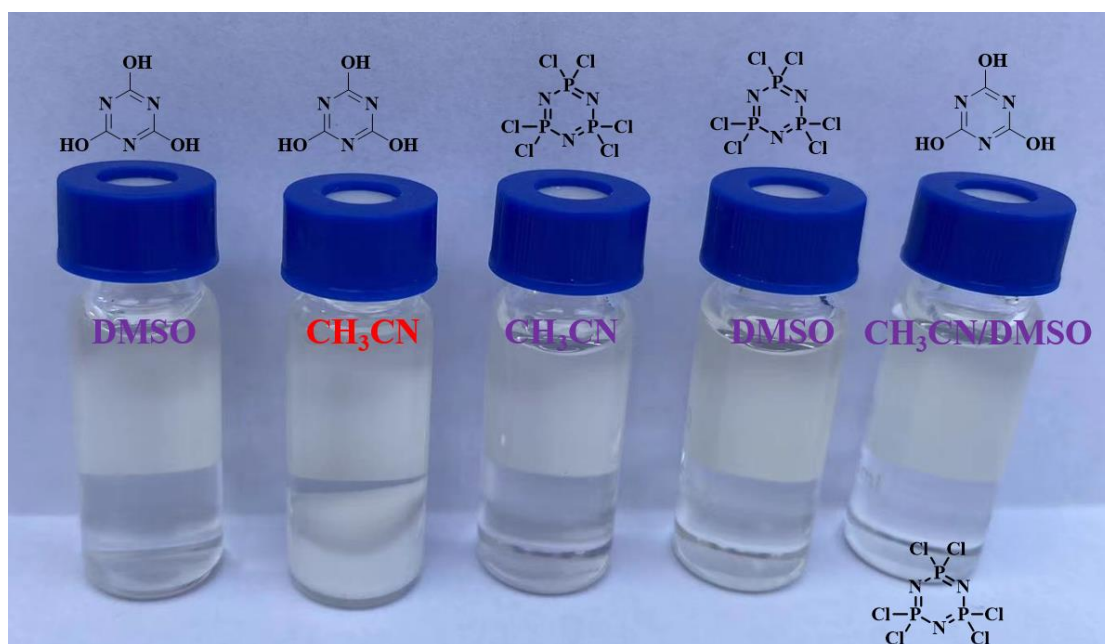

**Fig. S1.** Picture of the dissolution of cyanuric acid and hexachlorocyclotriphosphazene in a solvent.

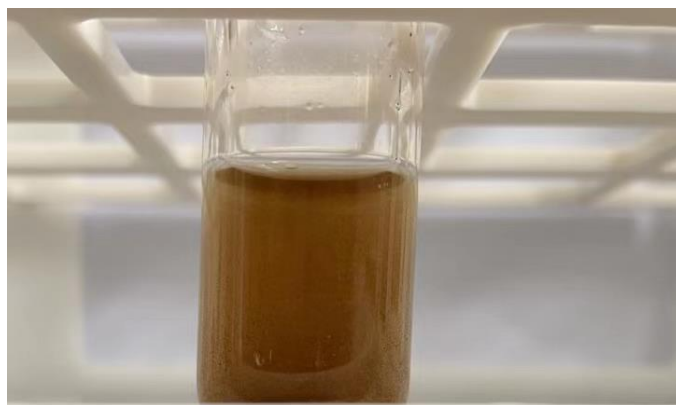

**Fig. S2.** Picture of D1M4-PC sample in the reaction solution.

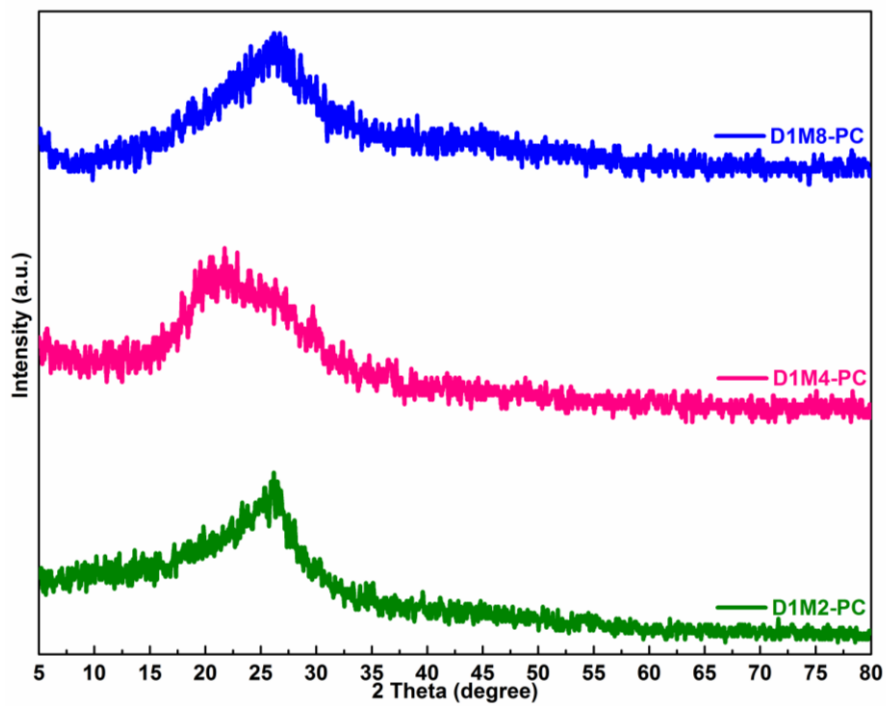

**Fig. S3.** XRD patterns of D1M2-PC, D1M4-PC and D1M8-PC samples.

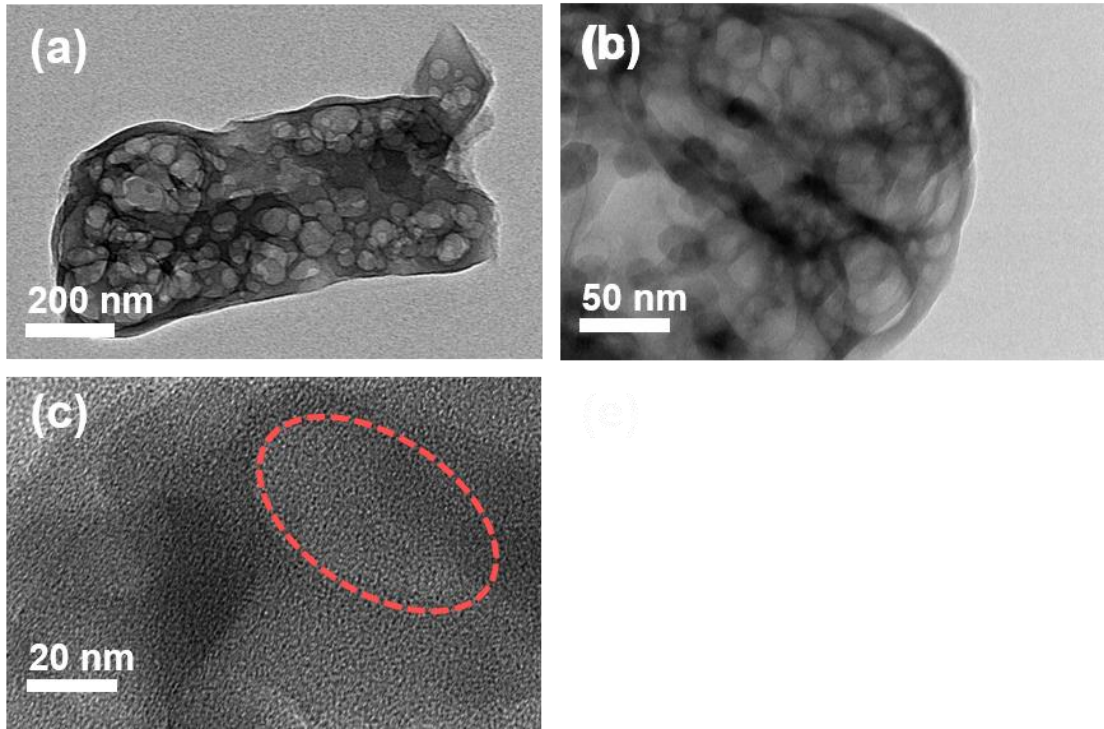

**Fig. S4.** TEM images (a, b) and HRTEM (c) of D1M2-PC.

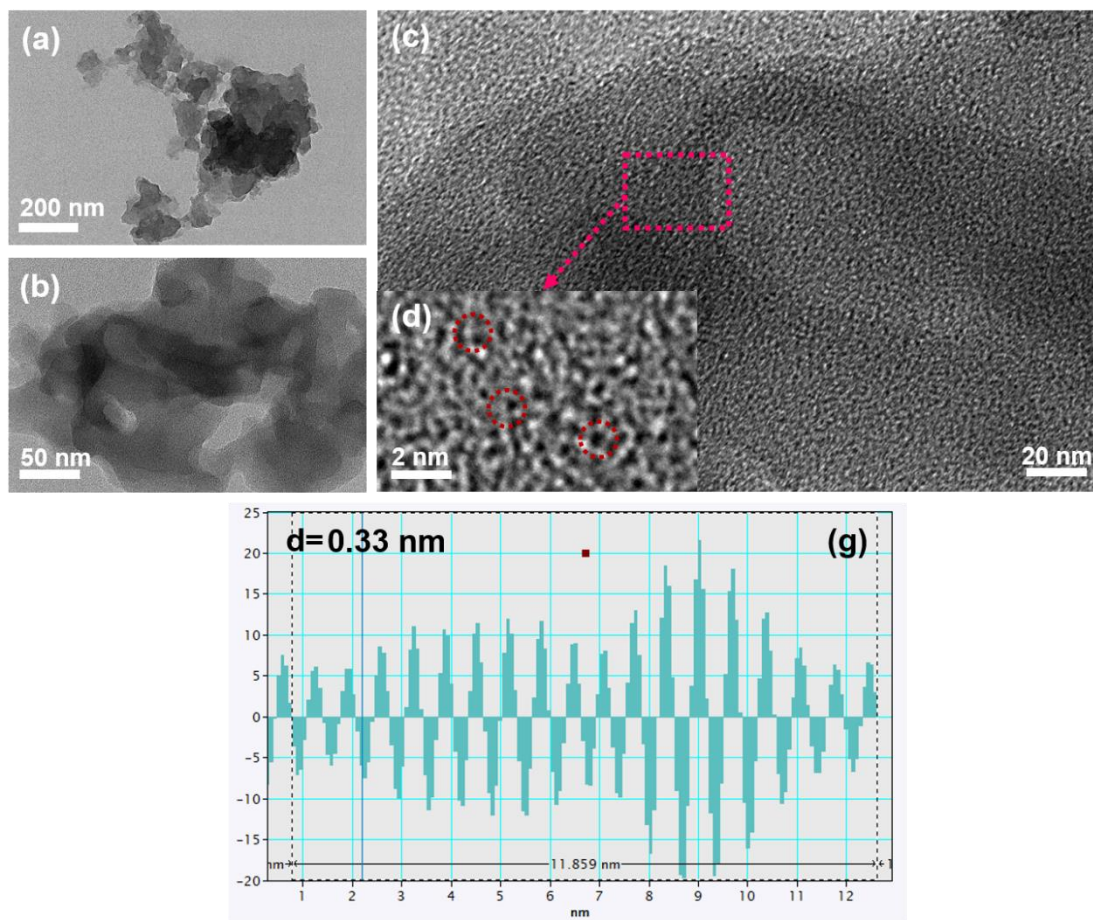

**Fig. S5.** TEM images (a, b), HRTEM (c and d) and interval length picture (e) of D1M8-PC.

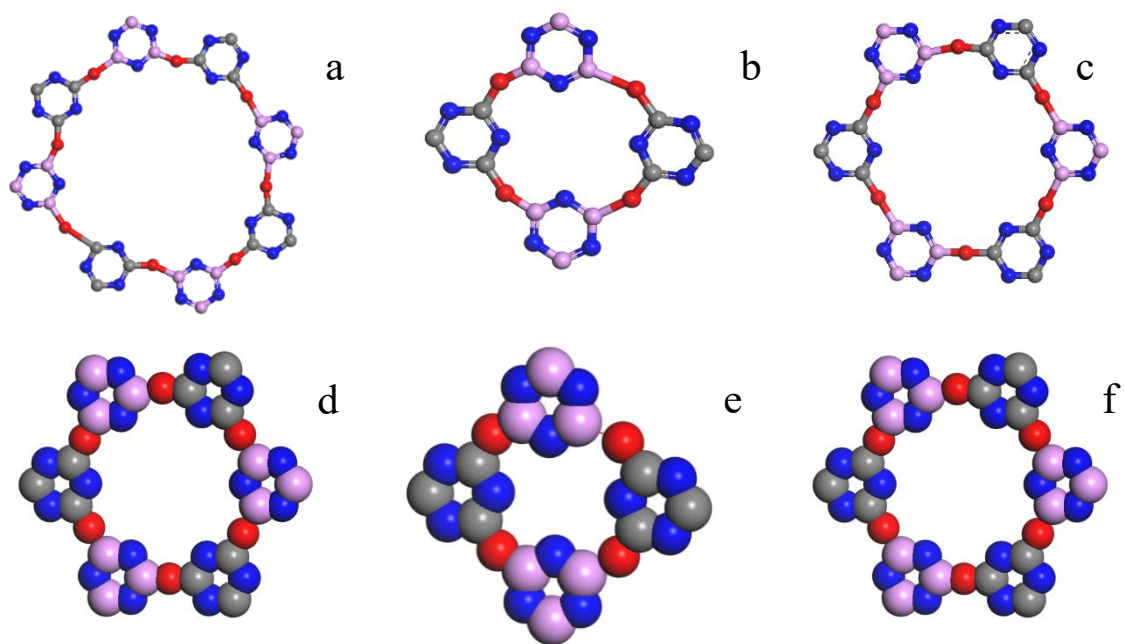

**Fig. S6.** Ball-stick representation of D1M2-PC, D1M4-PC and D1M8-PC (a-c) and CPK structure of D1M2-PC, D1M4-PC and D1M8-PC (d-f) (N element (Blue), P element (Pink), C element (Gray), and O element (Red)).



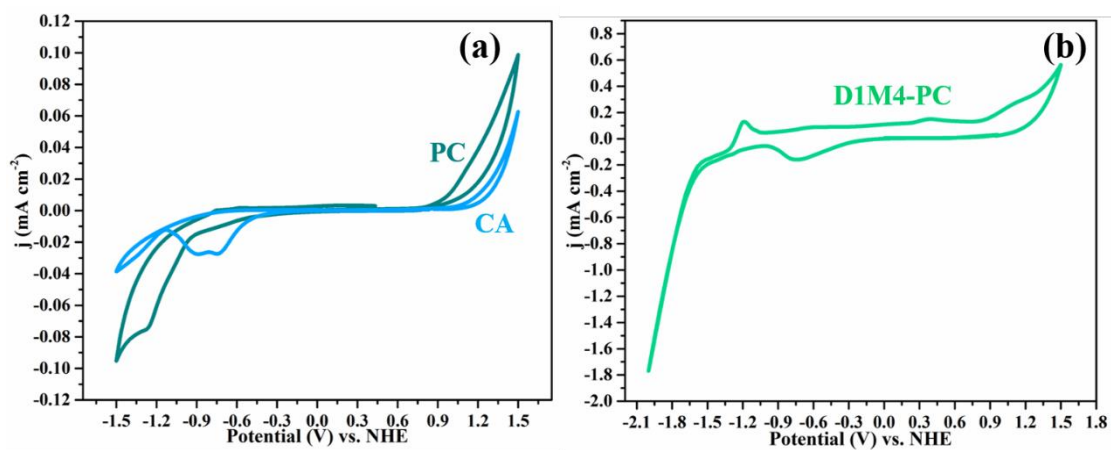

**Fig. S7.** (a) Cyclic voltammograms (CVs) of cyanuric acid (CA) and hexachlorocyclotriphosphazene (PC) in MeCN solution containing 0.1 M of tetrabutylammonium hexafluorophosphate (TBAHFP). (b) CV of D1M4-PC.

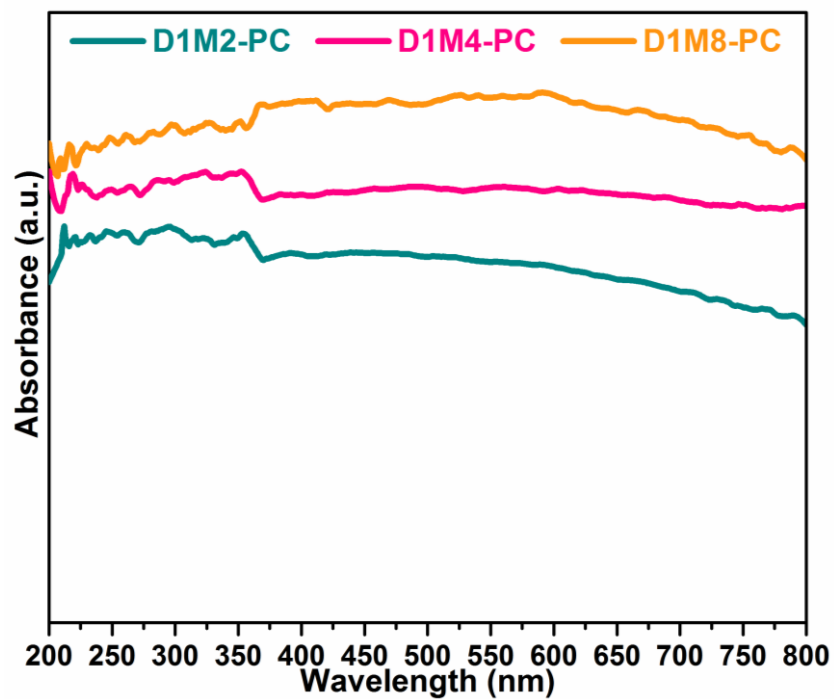

**Fig. S8.** UV-vis diffuse reflectance spectra (DRS) of D1M2-PC, D1M4-PC and D1M8-PC samples.

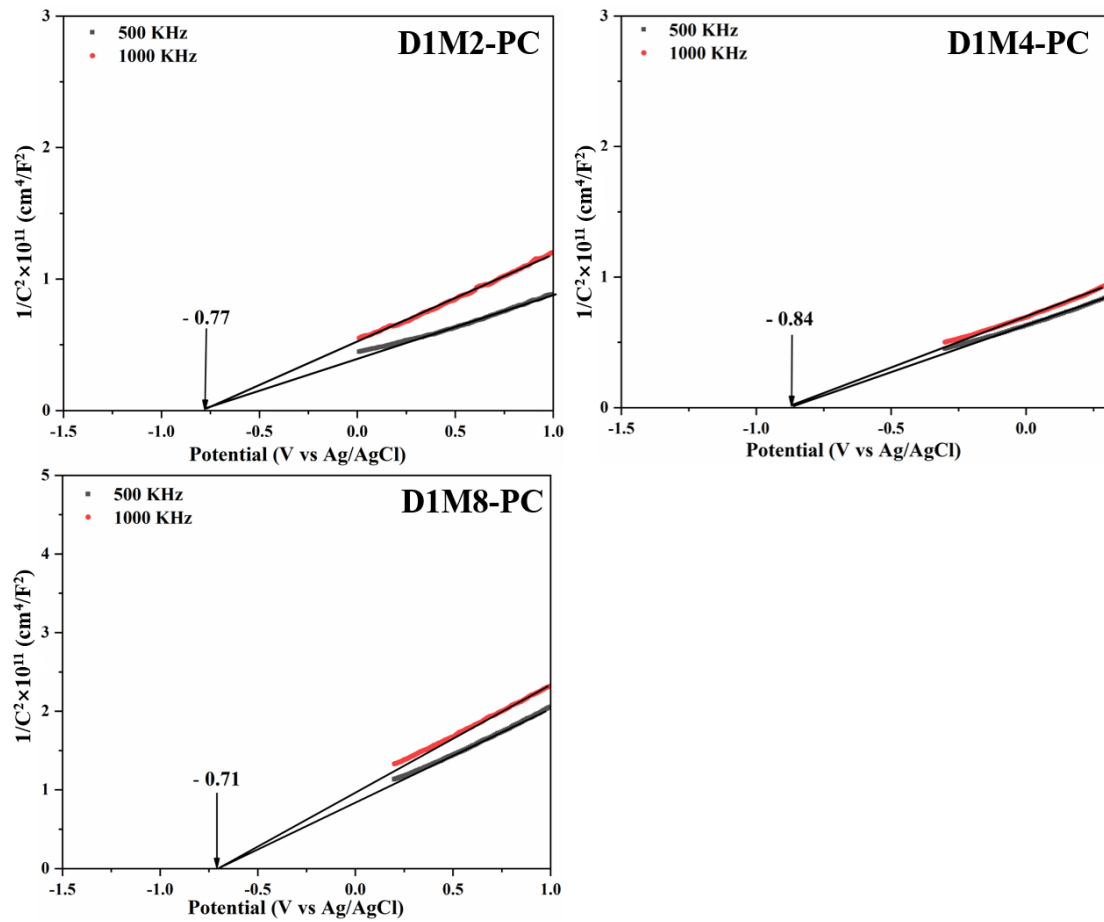

**Fig. S9.** The Mott-Schottky plots of D1M2-PC, D1M4-PC and D1M8-PC samples.

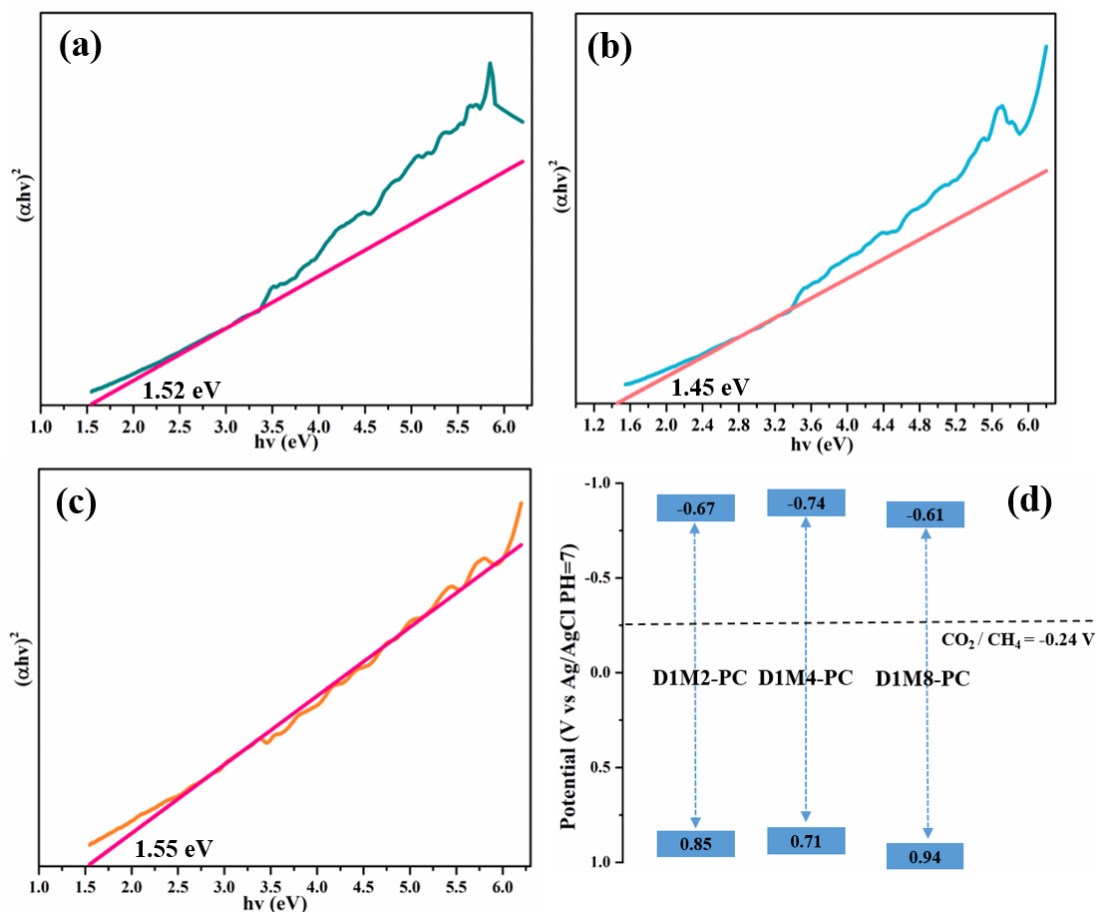

**Fig. S10.** (a) The  $(\alpha hv)^2$  versus  $h\nu$  curve of (a) D1M2-PC, (b) D1M4-PC and (c) D1M8-PC samples; The band structure of the compounds is calculated by the KubelKa-Munk (KM) method according to the following equation:  $\alpha hv = A(h\nu - E_g)^{1/2}$ , where  $\alpha$  is the absorption coefficient,  $h\nu$  is the photo energy,  $E_g$  is the band gap, and  $A$  is a constant. (d) The schematic diagram of the calculated band positions of D1M2-PC, D1M4-PC and D1M8-PC samples.

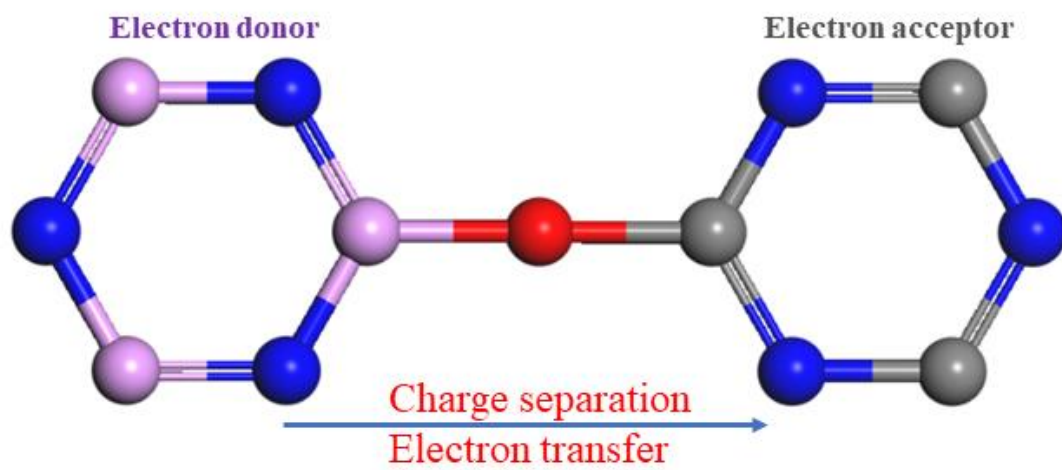

**Fig. S11.** Donor-acceptor structure of D1M4-PC sample (N element (Blue), P element (Pink), C element (Gray), and O element (Red)).

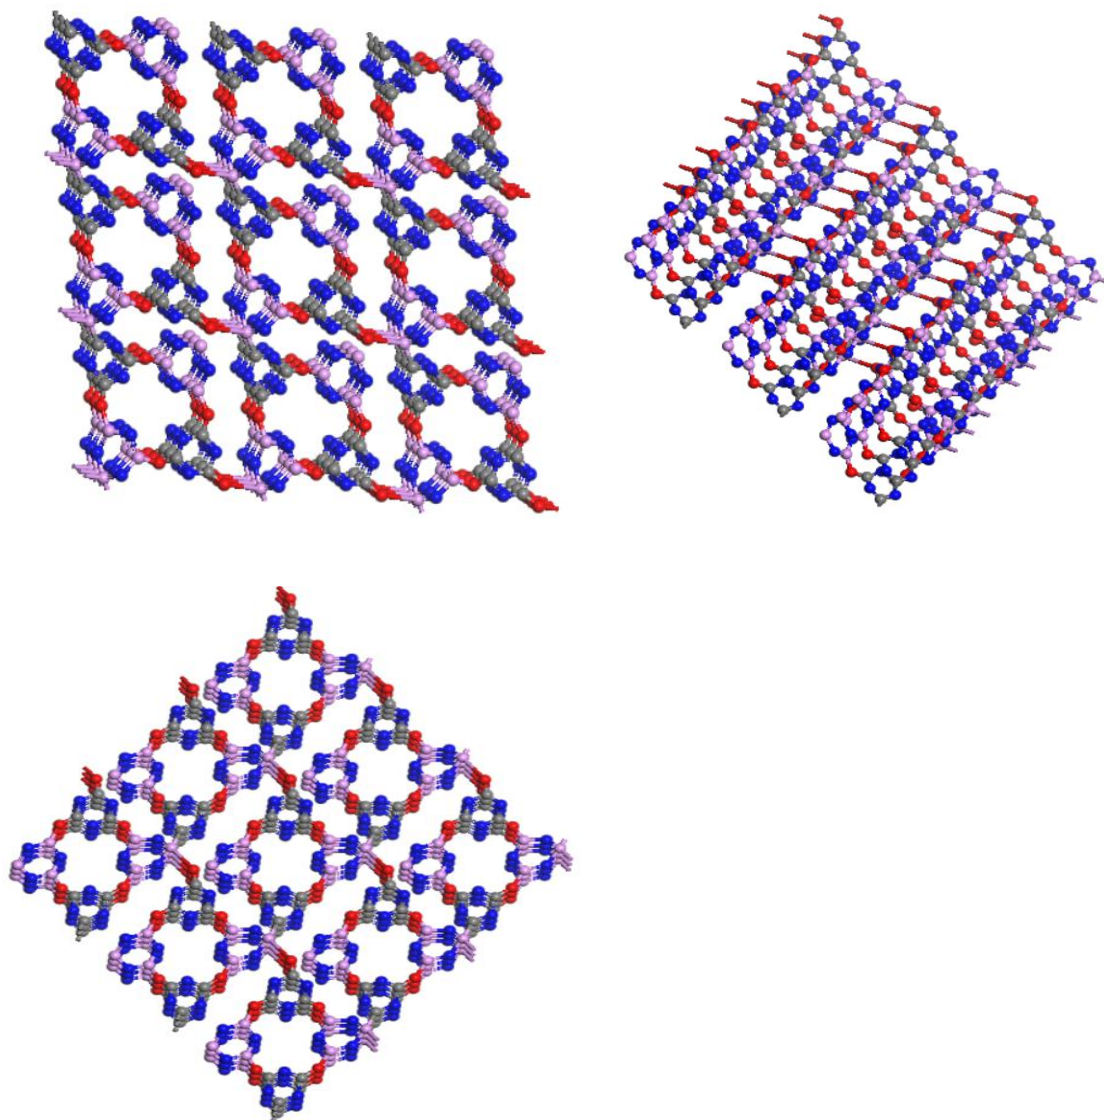

**Fig. S12.** Chemical skeleton of D1M4-PC sample (N element (Blue), P element (Pink), C element (Gray), and O element (Red)).

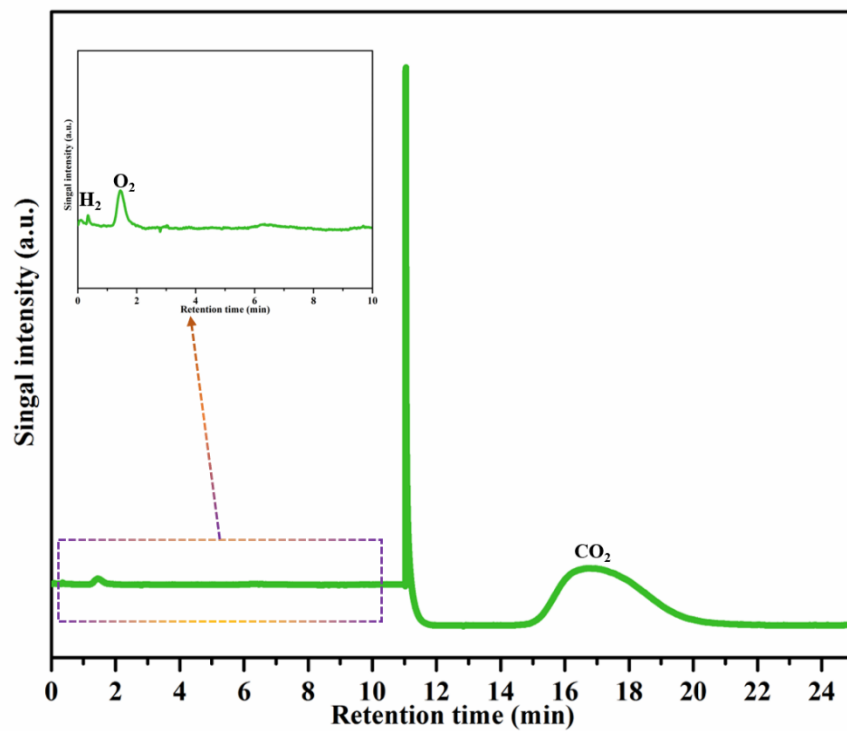

**Fig. S13.** GC spectrum of D1M4-PC sample with a thermal conductivity detector (TCD).

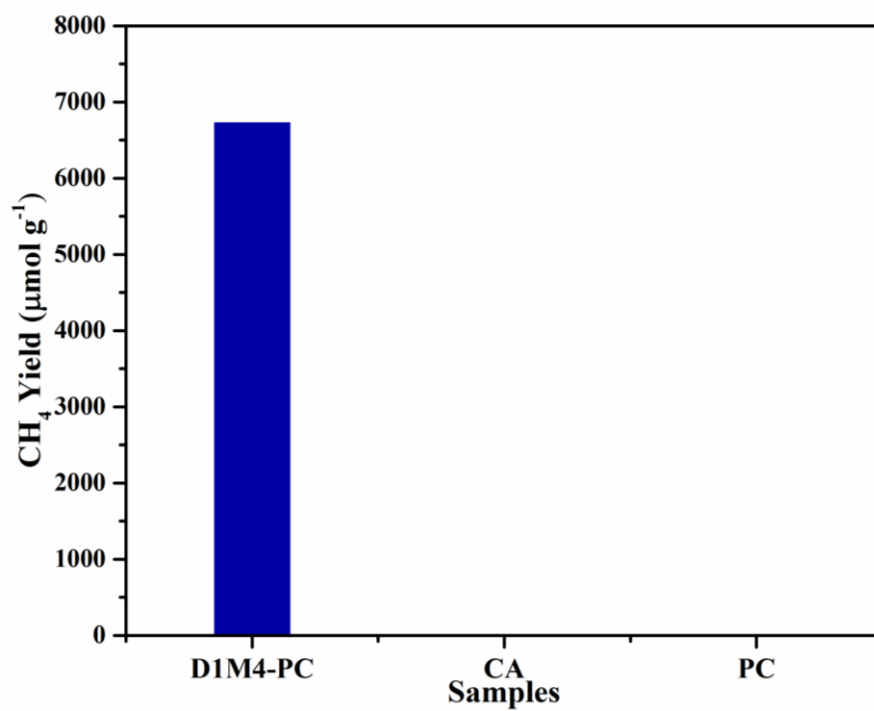

**Fig. S14.** Photocatalytic CO<sub>2</sub> conversion rates for cyanuric acid (CA), hexachlorocyclotriphosphazene (PC), and DIM4-PC samples.



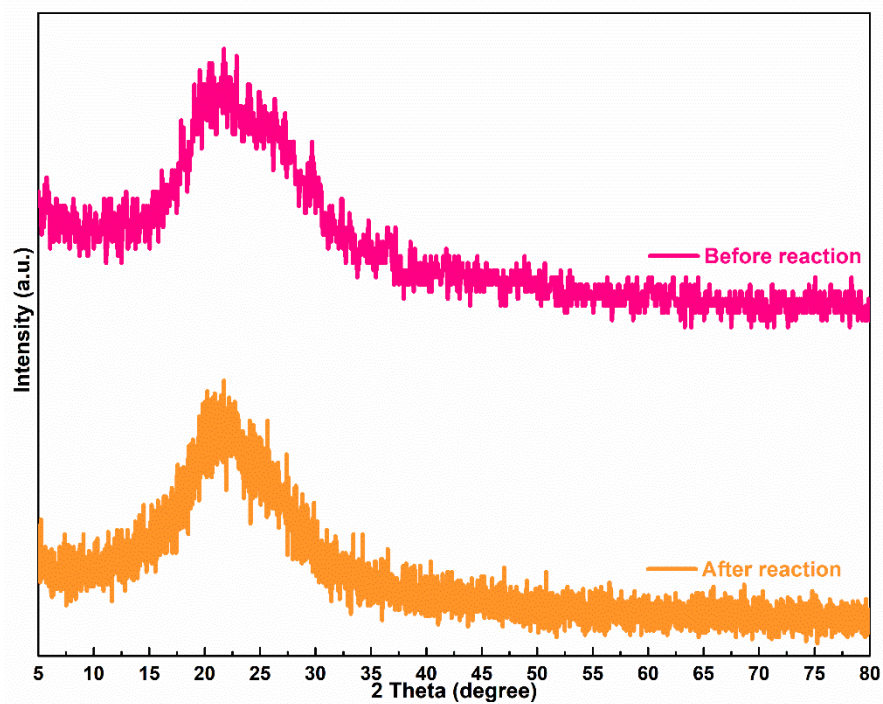

**Fig. S15.** XRD patterns of D1M4-PC sample before and after the stability test.

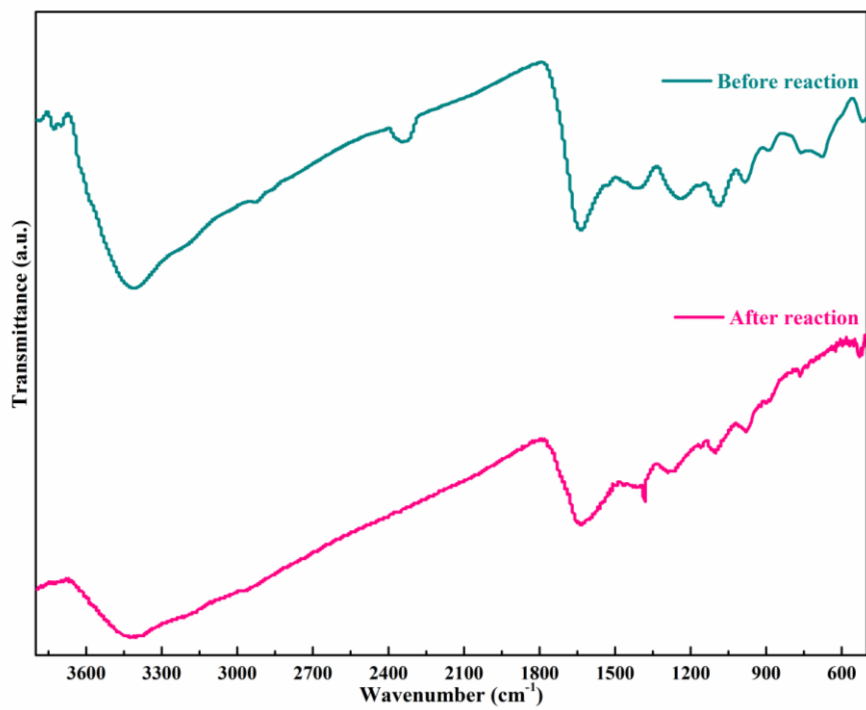

**Fig. S16.** FT-IR spectra of DIM4-PC sample before and after the stability test.

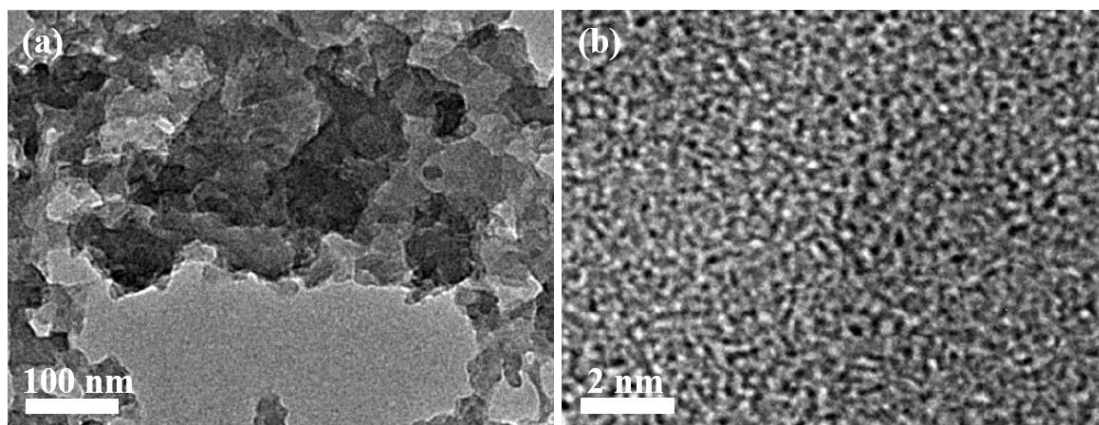

**Fig. S17.** TEM (a) and HRTEM (b) of D1M4-PC sample after the stability test.

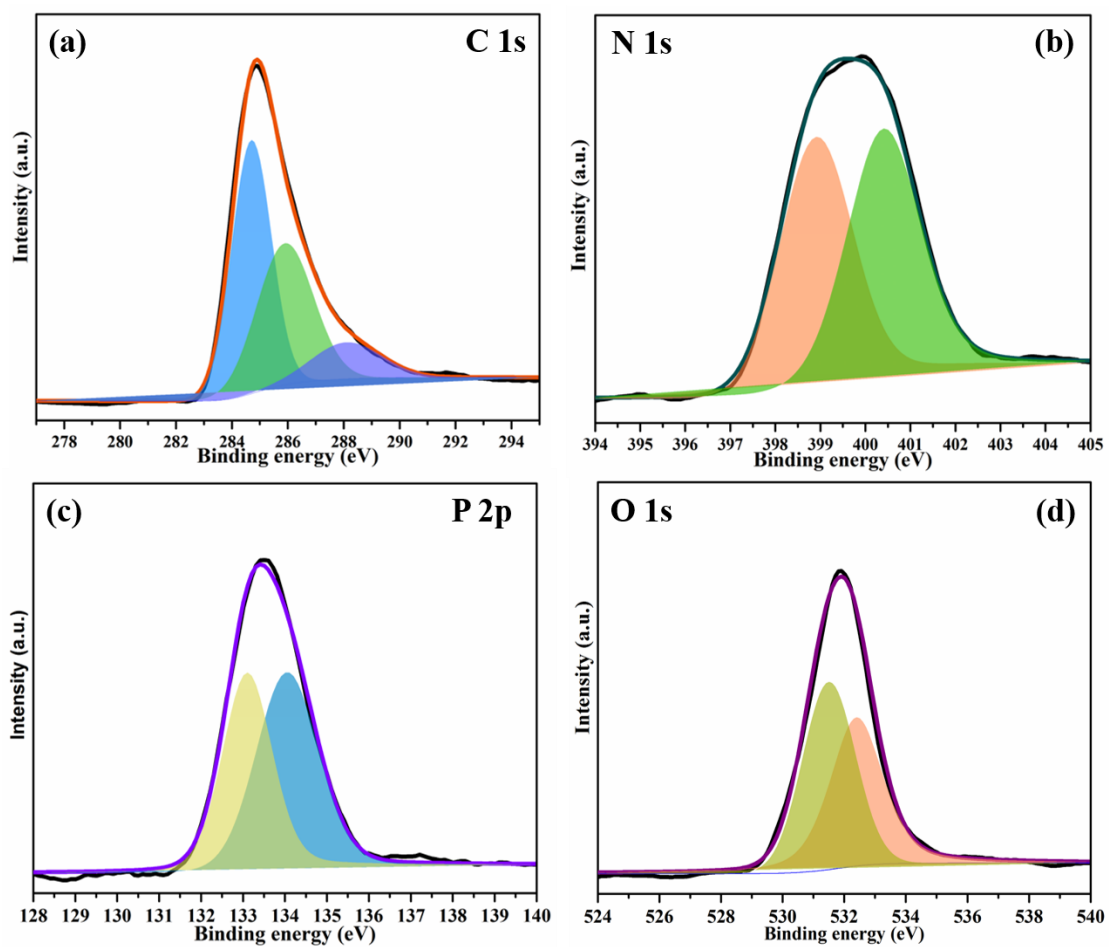

**Fig. S18.** XPS spectra of D1M4-PC after the stability test: (a) C 1s, (b) N 1s, (c) P 2p and (d) O 1s.

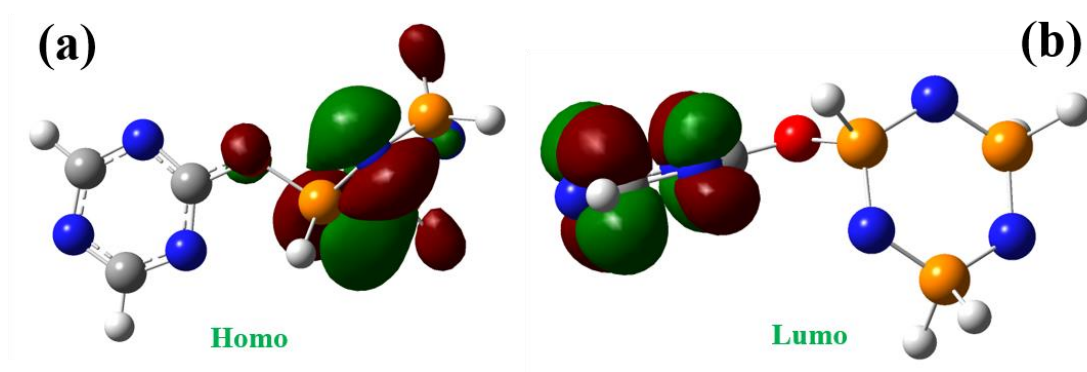

**Fig. S19.** Frontier molecular orbital picture of D-A structure (a: HOMO, b: LUMO) from DFT calculation using the 6-31(d,p) basis set in the B3LYP method.

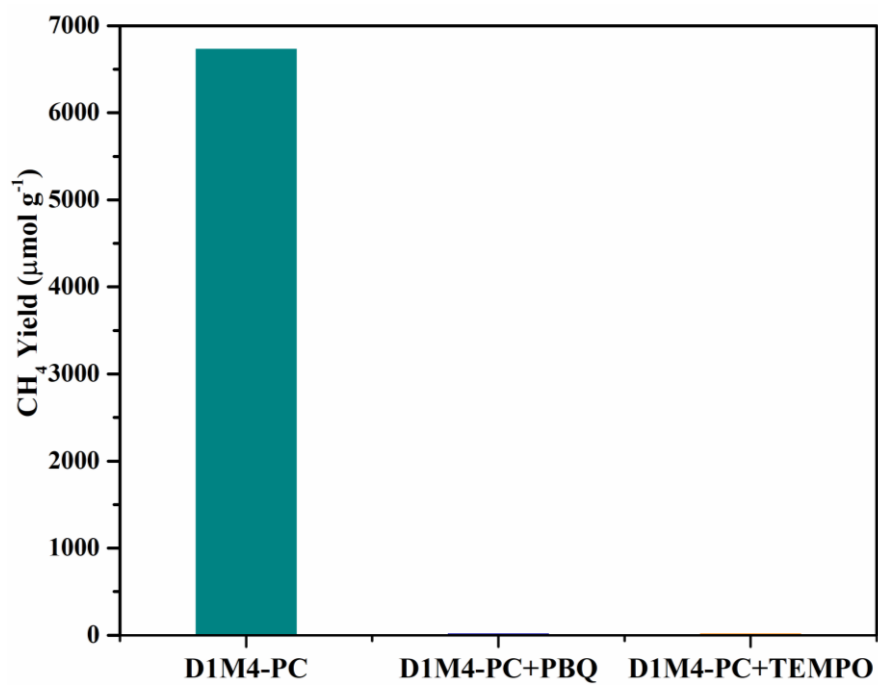

**Fig. S20.** Free radical trapping experiment of D1M4-PC.

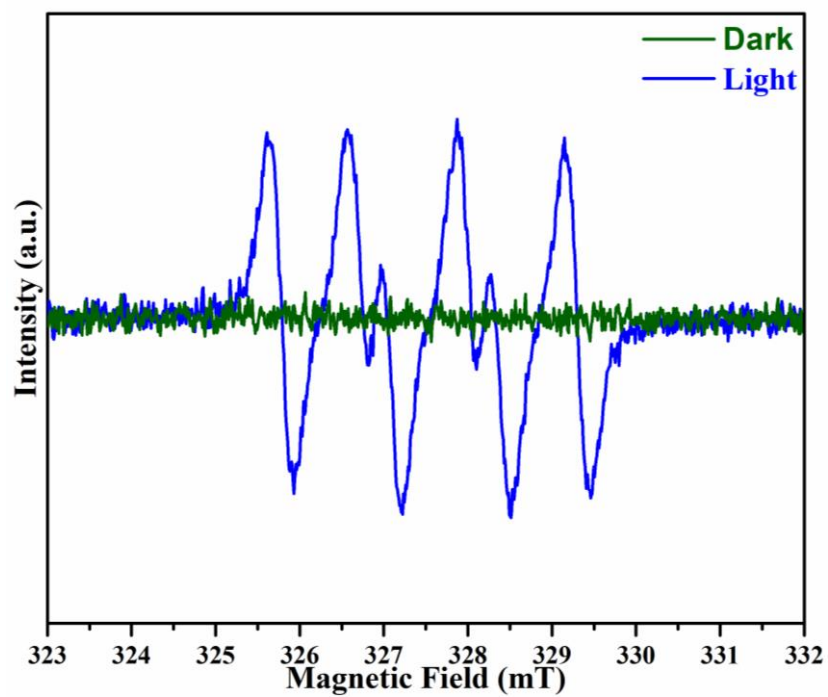

**Fig. S21.** ESR spectra of  $\cdot\text{O}_2^-$  in D1M4-PC sample.

## Computational Details

All computations were performed under the framework of Density Functional Theory (DFT) using the Gaussian 16 or MS software package of programs. In our calculation, the simplest possible repetitive unit consisting of single cyanuric acid and single phosphonitrile was taken into consideration. Molecular geometries were optimized using B3LYP(g) and energy was calculated using B3LYP(g,d).

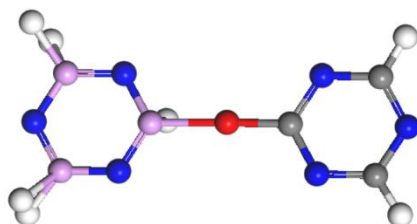

Ball-stick representation of D1M4-PC using in DFT calculate.

DFT-optimized geometry of D1M4-PC (singlet).

---

| Atom | x           | y           | z           |
|------|-------------|-------------|-------------|
| N    | -1.73872062 | -1.35046377 | 0.75296857  |
| P    | -0.53993591 | -0.29972954 | 0.85831432  |
| N    | -0.80039354 | 1.22382279  | 0.44771370  |
| P    | -2.09534569 | 1.61247668  | -0.44775712 |
| N    | -3.19608839 | 0.47345742  | -0.74794073 |
| P    | -3.01949620 | -1.02870329 | -0.18640248 |
| O    | 0.67292633  | -0.94381765 | -0.12431486 |
| N    | 2.71010837  | -0.89158193 | -1.11169532 |
| C    | 3.94855208  | -0.40013600 | -1.06668428 |
| N    | 4.43803826  | 0.44484605  | -0.14979670 |
| C    | 3.55297435  | 0.78465926  | 0.79110675  |
| N    | 2.28907925  | 0.36454747  | 0.86756258  |
| C    | 1.92718401  | -0.46572955 | -0.11712745 |
| H    | 3.88865280  | 1.46576892  | 1.57010289  |
| H    | 4.62653473  | -0.71707730 | -1.85642504 |
| H    | -3.05934679 | -1.93172640 | -1.27109059 |
| H    | -4.17133737 | -1.41013015 | 0.52995761  |
| H    | 0.04548405  | -0.37993801 | 2.11765638  |
| H    | -2.71249428 | 2.72633137  | 0.15749498  |
| H    | -1.66566256 | 2.17149670  | -1.67095298 |

---

Part of the Gaussian output file:

Mulliken charges:



|    |   |           |
|----|---|-----------|
| 1  | N | -0.654682 |
| 2  | P | 0.950038  |
| 3  | N | -0.659825 |
| 4  | P | 0.782871  |
| 5  | N | -0.679479 |
| 6  | P | 0.791086  |
| 7  | O | -0.535625 |
| 8  | N | -0.410488 |
| 9  | C | 0.246219  |
| 10 | N | -0.396266 |
| 11 | C | 0.254717  |
| 12 | N | -0.434669 |
| 13 | C | 0.668566  |
| 14 | H | 0.131480  |
| 15 | H | 0.131683  |
| 16 | H | -0.040569 |
| 17 | H | -0.038070 |
| 18 | H | -0.025847 |
| 19 | H | -0.038606 |
| 20 | H | -0.042534 |

Sum of Mulliken charges = 0.00000

Mulliken charges with hydrogens summed into heavy atoms:

| 1  |   |           |
|----|---|-----------|
| 1  | N | -0.654682 |
| 2  | P | 0.924191  |
| 3  | N | -0.659825 |
| 4  | P | 0.701731  |
| 5  | N | -0.679479 |
| 6  | P | 0.712448  |
| 7  | O | -0.535625 |
| 8  | N | -0.410488 |
| 9  | C | 0.377902  |
| 10 | N | -0.396266 |
| 11 | C | 0.386197  |
| 12 | N | -0.434669 |
| 13 | C | 0.668566  |

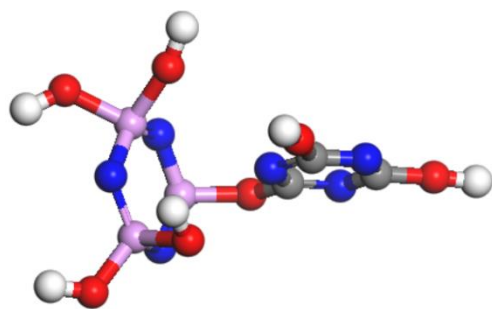

**Ball-stick representation of DIM4-PC using in DMol3 calculate for electrostatic potential energy.**

DMol3-optimized geometry of DIM4-PC.

| Atom | x                 | y                 | z                 |
|------|-------------------|-------------------|-------------------|
| N    | 9.33811063316486  | 9.66674496293331  | 4.10215850701181  |
| P    | 11.86123407225155 | 11.01813324913500 | 3.13212458543765  |
| N    | 14.55799073122141 | 10.18170191391016 | 4.21148691688898  |
| P    | 14.65973190960400 | 8.61945797156388  | 6.85217485181998  |
| N    | 12.12751877258279 | 7.26771451133700  | 7.87799970391317  |
| P    | 9.42592311460137  | 8.09195476979524  | 6.73483436788998  |
| O    | 11.53178927674260 | 14.21711780563321 | 3.26022167581976  |
| N    | 11.09485685168512 | 17.95297030013372 | 5.30647346047805  |
| C    | 10.94540236765615 | 19.11600686792085 | 7.54152827550298  |
| N    | 11.05467915210532 | 18.02516738689458 | 9.83236970869192  |
| C    | 11.33538492508340 | 15.51485145134674 | 9.73637604917056  |
| N    | 11.50545008692956 | 14.10654207824779 | 7.64032909105767  |
| C    | 11.37509643300762 | 15.44243437589849 | 5.48058228852209  |
| O    | 11.38407282485340 | 14.18509407208206 | 12.26061050926874 |
| O    | 10.66491312138720 | 21.95445937937583 | 7.45847445704100  |
| H    | 10.55303384580295 | 24.04852894507905 | 7.50606401775154  |
| H    | 11.58878701282122 | 13.09603680121291 | 14.04160896076139 |
| O    | 17.59844719488438 | 6.89047848543519  | 7.53392253036154  |
| O    | 8.66765664013738  | 4.76544252952172  | 7.40531609075861  |
| H    | 17.81729403982867 | 4.84455882392281  | 7.94163308099888  |
| H    | 9.76479786457199  | 2.98767494656442  | 7.59434712792057  |
| H    | 11.26528696688916 | 11.46273397493783 | 0.45557989096986  |
| O    | 14.56535851826974 | 10.90717646981483 | 9.46897351914460  |
| O    | 6.82141220810108  | 9.45610551224441  | 8.59112453865332  |
| H    | 4.99720291053773  | 9.95338570237613  | 9.49935465172530  |
| H    | 13.45008646014807 | 9.84976319014228  | 10.89654303571155 |

**Table S1.** The comparison of photocatalytic CO<sub>2</sub> reduction activity among some representative photocatalysts reported in the literatures over recent years and *this work*.

| Photocatalyst                                                                         | Light source                                                   | Major Product<br>(Yield and Rate)                                  | CH <sub>4</sub><br>selectivity | Ref.                 |
|---------------------------------------------------------------------------------------|----------------------------------------------------------------|--------------------------------------------------------------------|--------------------------------|----------------------|
| <b>D1M4-PC</b>                                                                        | <b>300 W Xenon lamp<br/>(<math>\lambda \geq 420</math> nm)</b> | <b>CH<sub>4</sub><br/>(6733 <math>\mu\text{mol g}^{-1}</math>)</b> | <b>&gt;99%</b>                 | <b>This<br/>work</b> |
| Cu <sub>2</sub> O-111-Cu <sup>0</sup>                                                 | 300 W Xenon lamp<br>( $\lambda \geq 420$ nm)                   | CH <sub>4</sub><br>(150 $\mu\text{mol g}^{-1}$ )                   | 97%                            | [1]                  |
| CuPP                                                                                  | white LED<br>( $\lambda > 400$ nm)                             | CO<br>(16.1 $\mu\text{mol g}^{-1}$ )                               | 95%                            | [2]                  |
| V <sub>S</sub> -CuInS <sub>8</sub>                                                    | Visible light                                                  | CH <sub>4</sub><br>(209 $\mu\text{mol g}^{-1}$ )                   | 100%                           | [3]                  |
| MOF-525-Co                                                                            | 300 W Xenon lamp<br>(400 nm < $\lambda$ < 800 nm)              | CO<br>(1210 $\mu\text{mol g}^{-1}$ )                               | 40.9%                          | [4]                  |
| Cu <sub>2</sub> O@Cu@Ui<br>O-66-NH <sub>2</sub>                                       | 300 W Xenon lamp<br>( $\lambda > 400$ nm)                      | CO<br>(104.5 $\mu\text{mol g}^{-1}$ )                              | 61.4%                          | [5]                  |
| 5%APCN/CdS<br>e-DETA                                                                  | 300 W Xenon lamp<br>( $\lambda > 420$ nm)                      | CH <sub>4</sub><br>(25.9 $\mu\text{mol g}^{-1}$ )                  | 25.3%                          | [6]                  |
| CMP-BT <sup>3</sup>                                                                   | 300 W Xenon lamp<br>( $\lambda > 420$ nm)                      | CO<br>(50 $\mu\text{mol g}^{-1}$ )                                 | 81.6%                          | [7]                  |
| MIL-<br>101(Cr)-Ag                                                                    | 300 W Xe lamp<br>(400 nm < $\lambda$ < 780<br>nm)              | CH <sub>4</sub><br>(427.5 $\mu\text{mol g}^{-1}$ )                 | 62.9%                          | [8]                  |
| rGO-coated<br>Ag/Cu <sub>2</sub> O                                                    | 300 W Xe lamp<br>( $\lambda > 380$ nm)                         | CH <sub>4</sub><br>(82.6 $\mu\text{mol g}^{-1}$ )                  | 90%                            | [9]                  |
| Cs <sub>2</sub> AgBiBr <sub>6</sub> /Ti <sub>3</sub><br>C <sub>2</sub> T <sub>x</sub> | 300 W Xe lamp<br>( $\lambda > 420$ nm)                         | CO<br>(50.6 $\mu\text{mol g}^{-1}$ )                               | 68%                            | [10]                 |

[1] Y. Deng, C. Wan, C. Li, Y. Y. Wang, X. Y. Mu, W. Liu, Y. P. Huang, P. K. Wong, and L. Q. Ye, Synergy effect between facet and zero-valent copper for selectivity photocatalytic methane formation from CO<sub>2</sub>, ACS Catal. 12 (2022) 4526-4533.

[2] H. Yuan, B. Cheng, J. Lei, L. Jiang, Z. Han, Promoting photocatalytic CO<sub>2</sub> reduction with a molecular copper purpurin chromophore, Nat. Commun. 12 (2021) 1835-1844.

- [3] X. D. Li, Y. F. Sun, J. Q. Xu, Y. J. Shao, J. Wu, X. L. Xu, Y. Pan, H. X. Ju, J. F. Zhu and Y. Xie, Selective visible-light-driven photocatalytic CO<sub>2</sub> reduction to CH<sub>4</sub> mediated by atomically thin CuIn<sub>5</sub>S<sub>8</sub> layers, *Nat. Energy*. 4 (2019) 690-699.
- [4] H. B. Zhang, J. Wei, J. C. Dong, G. G. Liu, L. Shi, P. F. An, G. X. Zhao, J. T. Kong, X. J. Wang, X. G. Meng, J. Zhang, J. H. Ye, Efficient visible-light-driven carbon dioxide reduction by a single-atom implanted metal-organic framework, *Angew. Chem., Int. Ed.* 55 (2016) 14310-14314.
- [5] S. Q. Wang, X. Y. Zhang, X. Y. Dao, X. M. Cheng, W. Y. Sun, Cu<sub>2</sub>O@Cu@UiO-66-NH<sub>2</sub> ternary nanocubes for photocatalytic CO<sub>2</sub> reduction, *ACS Appl. Nano Mater.* 3 (2020) 10437-10445.
- [6] Y. Huo, J. F. Zhang, K. Dai, C. H. Liang, Amine-modified S-Scheme porous g-C<sub>3</sub>N<sub>4</sub>/CdSe–diethylenetriamine composite with enhanced photocatalytic CO<sub>2</sub> reduction activity, *ACS Appl. Energy Mater.* 4 (2021) 956-968.
- [7] C. Yang, W. Huang, L. C. Silva, K. Zhang, X. C. Wang, Functional conjugated polymers for CO<sub>2</sub> reduction using visible light, *Chem. Eur. J.* 24 (2018) 17454-17458.
- [8] F. Guo, S. Z. Yang, Y. Liu, P. Wang, J. Huang, W. Y. Sun, Size engineering of metal-organic framework MIL-101(Cr)-Ag hybrids for photocatalytic CO<sub>2</sub> reduction, *ACS Catal.* 9 (2019) 8464-8470.
- [9] Z. L. Tang, W. J. He, Y. L. Wang, Y. C. Wei, X. L. Yu, J. Xiong, X. Wang, X. Zhang, Z. Zhao, J. Liu, Ternary heterojunction in rGO-coated Ag/Cu<sub>2</sub>O catalysts for boosting selective photocatalytic CO<sub>2</sub> reduction into CH<sub>4</sub>, *Appl. Catal. B Environ.* 311 (2022) 121371-121385.
- [10] Z. P. Zhang, B. Z. Wang, H. B. Zhao, J. F. Liao, Z. C. Zhou, T. H. Liu, B. C. He, Q. Wei, S. Chen, H. Y. Chen, D. B. Kuang, Y. Li, G. C. Xing, Self-assembled lead-free double perovskite-MXene heterostructure with efficient charge separation for photocatalytic CO<sub>2</sub> reduction, *Appl. Catal. B Environ.* 312 (2022) 121358-121367.
